# Supplementary material for: Molecular mechanism study of the structural regulation of the N-terminal domain binding antibody on the receptor binding domain of SARS-CoV-2
Source: Royal Society of Chemistry journal article supplement (doi:10.1039/d3cp01378b), 2023-01-01
Supplement: d3cp01378b1.pdf [file d3cp01378b1.pdf]

Supp

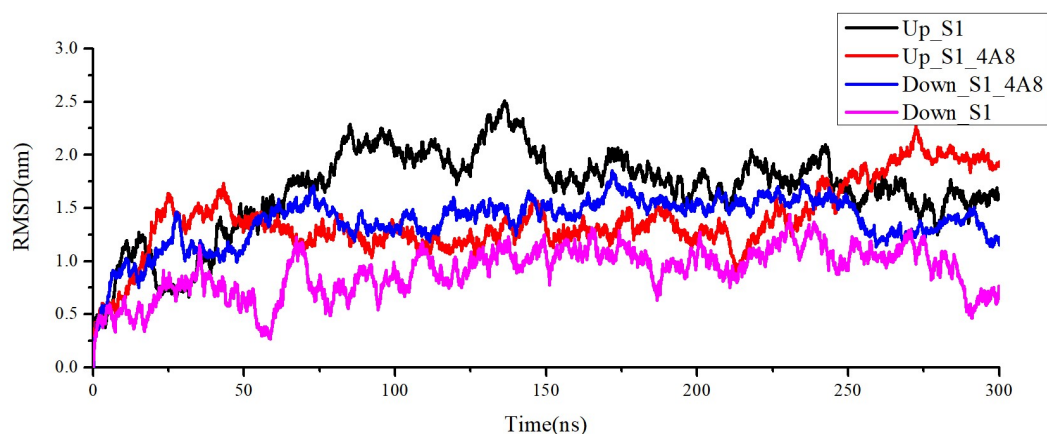

## The Molecular Mechanism Study of Structural Regulation of the N-terminal Domain Binding Antibody on the Receptor Binding Domain of SARS-CoV-2

Received 00th January 20xx,  
Accepted 00th January 20xx

DOI: 10.1039/x0xx00000x

Hongtao Liu<sup>a</sup>, Zihui Tian<sup>a</sup>, Shuai Yuan<sup>a\*</sup>, and Shuangyan Zhou<sup>a\*</sup>

### Supplementary Figures and Tables

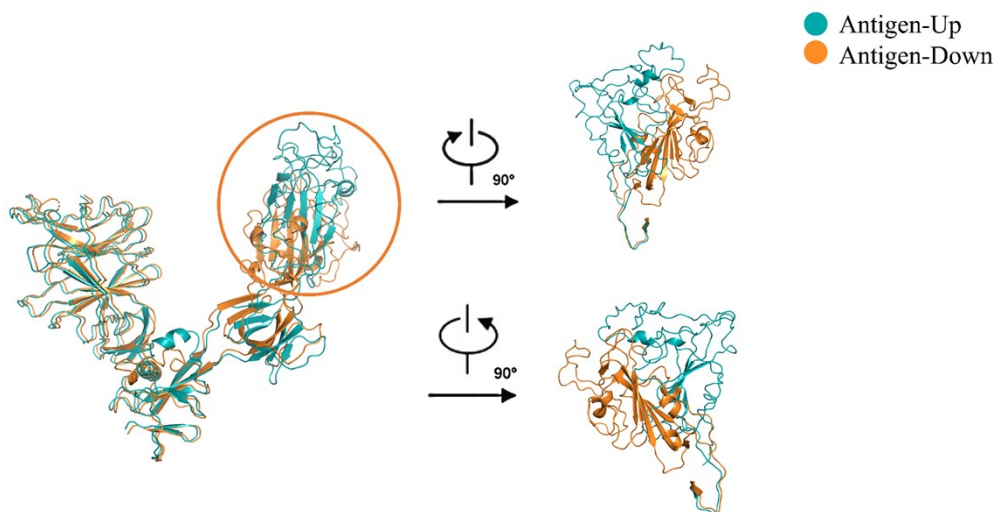

Fig. S1. Structure superposition comparison between Up and Down states of the S1 before simulation. (Where the dark green structure is the structure of the complex in the Up state and the orange structure is the structure of the complex in the Down state).

<sup>a</sup> Chongqing Key Laboratory of Big Data for Bio Intelligence, Chongqing University of Posts and Telecommunications, Chongqing, 400065, China.

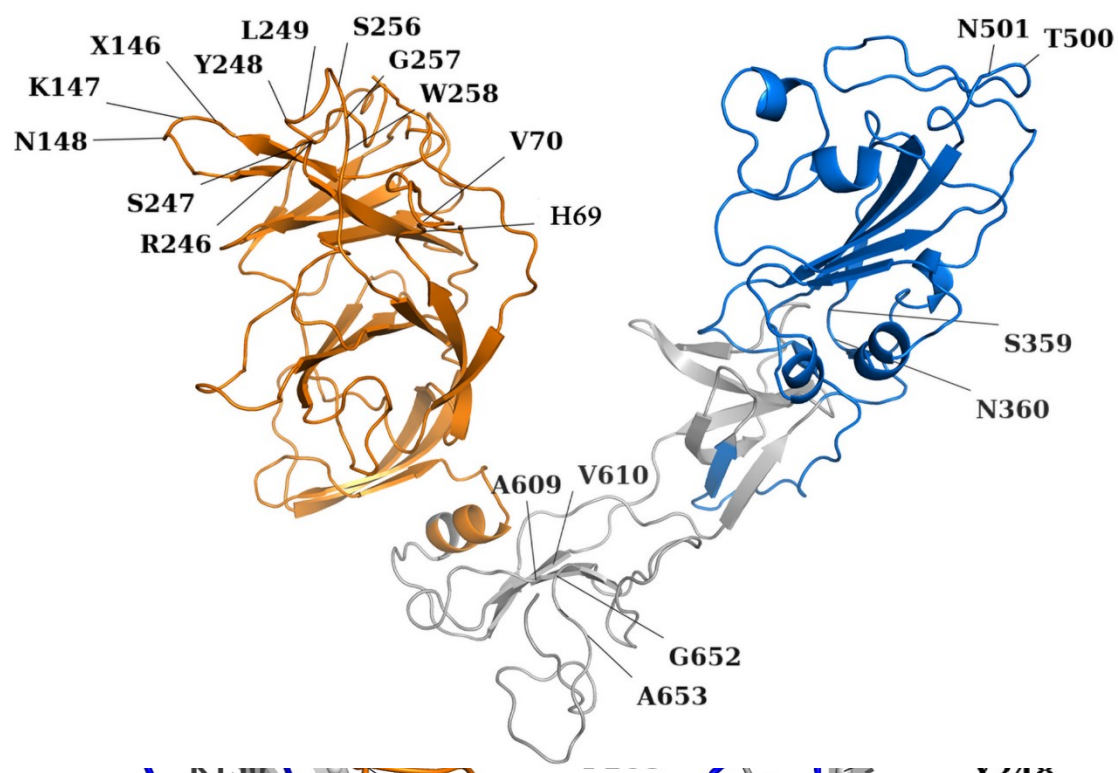

Fig. S5. Distribution of important contiguous residues on S1. (The orange part is NTD, the blue part is RBD, and the gray part is SD1 and SD2).

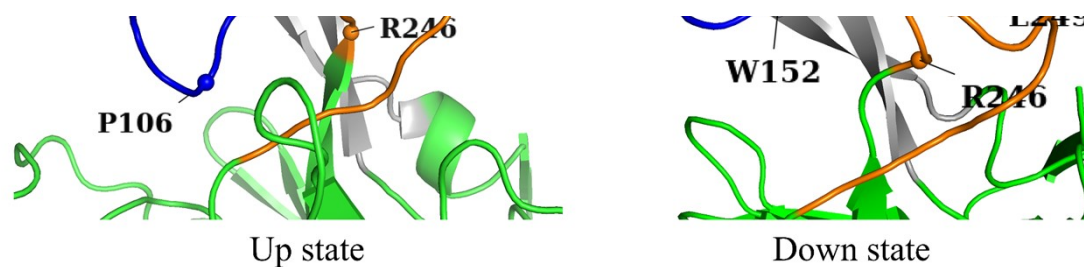

Fig. S3. Structure comparison of 4A8 antibody and NTD binding site. (Left panel is Up state, right panel is Down state, blue part is 4A8 antibody, green part is NTD, the rest key structures have been marked with different colors in the figure).

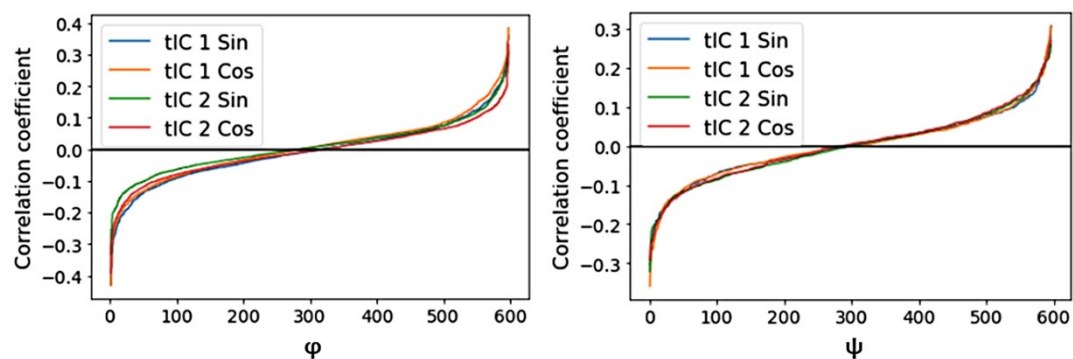

Fig. S4. Correlation coefficients of  $\phi$  (left) and  $\psi$  angles (right) in ascending order.

Table S1. Analysis of H-bonds occupancy between S1 and 4A8 in the Up state, "L" represents ligand 4A8 and "R" represents receptor S1.

| Acceptor | Donor  | Occupancy(%) |
|----------|--------|--------------|
| L E31    | R R246 | 49.90        |
| L E72    | R K147 | 43.51        |
| L E72    | R K134 | 36.73        |
| L E31    | R R246 | 36.53        |
| L D52    | R K137 | 23.95        |
| L L32    | R K134 | 22.56        |
| L E54    | R K137 | 21.76        |
| L E31    | R Y235 | 18.16        |
| R N135   | L T74  | 17.96        |
| L D52    | R K137 | 17.76        |
| L E29    | R K134 | 16.57        |
| L D52    | R K137 | 15.17        |

Table S2. Analysis of H-bonds occupancy between S1 and 4A8 in the Down state, "L" represents ligand 4A8 and "R" represents receptor S1.

| Acceptor | Donor  | Occupancy(%) |
|----------|--------|--------------|
| L E31    | R R246 | 50.70        |
| R Y132   | L Y111 | 35.53        |
| L L32    | R K147 | 23.15        |
| L E31    | R Y132 | 22.16        |
| L L32    | R K134 | 20.76        |
| L D55    | R K137 | 18.56        |
| L E31    | R233   | 15.57        |
